# Supplementary material for: Dual TGFβ/BMP Pathway Inhibition Enables Expansion and Characterization of Multiple Epithelial Cell Types of the Normal and Cancerous Breast
Source: Oxford University Press journal article supplement (doi:10.1158/1541-7786.mcr-19-0165), 2019-04-16
Supplement: 15417786mcr190165-sup-216982_2_supp_5441594_ppfwn3.docx [file 15417786mcr190165-sup-216982_2_supp_5441594_ppfwn3.docx]

| **Table S1: Details of tissue samples used in the study** | | | | | |
| --- | --- | --- | --- | --- | --- |
| **Sample name** | **Age** | **Gender** | **Menopausal stage** | **BMI** | **Additional information**  **(race, body site, histology type, etc..)** |
| KTB200 | 36 | F | Pre | 22.8 | White, breast, normal tissue |
| KTB201 | 31 | F | Pre | 25.8 | White, breast, normal tissue |
| KTB202 | 38 | F | Pre | 23.6 | White, breast, normal tissue |
| KTB205 | 20 | F | Pre | 27.7 | White, breast, normal tissue |
| KTB203 | 25 | F | Pre | 31.5 | AFRNAMER/Hispanic, breast, normal tissue |
| KTB204 | 55 | F | Pre | 41 | White/Hispanic, breast, normal tissue |
| KTB251-PA | 55 | F | Post | 22.5 | White/Hispanic, Protective alleles, breast, normal tissue |
| KTB250-PA | 37 | F | Pre | 34.6 | White/Hispanic, Protective alleles, breast, normal tissue |
| BRCA1-02 | 45 | F |  |  | White,BRCA1+, breast, infiltrating/invasive ductal carcinoma |
| BRCA1-01 | 35 | F |  |  | White,BRCA1+, breast, benign tissue |
| BRCA2-02 | 43 | F |  |  | White, BRCA 2+, breast, benign tissue |
| BRCA2-01 | 32 | F |  |  | White,BRCA2+, breast, benign tissue |
| BRCA2-03-RB | 38 | F |  |  | White,BRCA2+, breast, normal tissue |
| BRCA2-03-LB | 38 | F |  |  | White,BRCA2+, breast, infiltrating/invasive ductal carcinoma |
| BR300-T | 57 | F |  | 28.4 | White, ER+/PR-, breast, infiltrating/invasive ductal and lobular carcinoma |
| BR302-T | 44 | F |  | 38.0 | White ,ER+/PR+, breast, infiltrating/invasive carcinoma |
| BR302-N | 44 | F |  | 38.0 | White, ER+/PR+, breast, normal adjacent |
| BR301-T | 44 | F |  | 25.2 | Non Hispanic/White ,ER+/PR+, breast, carcinoma NOS, primary cancer |
| BR303-T | 44 | F |  | 30.8 | African American, TNBC, breast, infiltrating/invasive ductal carcinoma |
| OV353-MT | 51 | F |  |  | White, Ascites fluid from ovary, granulosa cell tumor NOS |
| OV351-MT | 61 | F | Post |  | White, Ascites fluid from fallopian tube, serous carcinoma |
| OV352-MT | 54 | F | Post |  | White, Ascites fluid from ovary, serous carcinoma |
| PAN354-MT | 51 | M | N.A. |  | White, Pancreas, neuroendocrine carcinoma |

|  |  |  |  |  |  |
| --- | --- | --- | --- | --- | --- |
|  |  |  |  |  |  |
|  |  |  |  |  |  |
|  |  |  |  |  |  |
